# Supplementary material
Source: PubMed Central journal article supplement (PMC5023510)
Supplement: mol-22-16_077_Klotz_Suppl.pdf [file mol-22-16_077_Klotz_Suppl.pdf]

Supplemental Data

Mutations in the Na<sup>+</sup>/Citrate Cotransporter NaCT (SLC13A5) in Pediatric Patients with Epilepsy and Developmental Delay

Jenna Klotz,<sup>1</sup> Brenda E Porter,<sup>1</sup> Claire Colas,<sup>2</sup> Avner Schlessinger,<sup>2,3</sup> and Ana M Pajor<sup>4</sup>

Online address: <http://www.molmed.org>

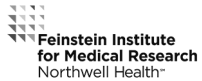

Supplementary Table S1. Demographic information and birth history for subjects in current study.

| Family | Subject | Preterm | Country of origin | Ethnicity               | Maternal education     | Paternal education     | Consanguinity |
|--------|---------|---------|-------------------|-------------------------|------------------------|------------------------|---------------|
| A      | 1       | No      | USA               | Caucasian               | Bachelor's             | Doctorate              | No            |
|        | 2       | No      |                   |                         |                        |                        |               |
| B      | 3       | No      | Netherlands       | Caucasian               | Trade/Technical school | Trade/Technical school | No            |
| C      | 4       | No      | USA               | Caucasian               | Bachelor's             | Master's               | No            |
|        | 5       | No      |                   |                         |                        |                        |               |
| D      | 6       | Yes     | USA               | South East Asian        | Bachelor's             | Master's               | No            |
| E      | 7       | Yes     | Brazil            | Hispanic/Latin American | Bachelor's             | Bachelor's             | No            |
|        | 8       | No      |                   |                         |                        |                        |               |
| F      | 9       | No      | Brazil            | Caucasian               | Master's               | High school            | No            |

Supplementary Table S2. Additional information on seizure history.

| Subject    | Status epilepticus (duration of longest episode if reported) | Seizure triggers         | EEG findings                                                | Medication trials, ineffective | Supplements/other treatments, ineffective ( <u>underlined</u> if worsened seizures)                       |
|------------|--------------------------------------------------------------|--------------------------|-------------------------------------------------------------|--------------------------------|-----------------------------------------------------------------------------------------------------------|
| 1          | Y                                                            | Early morning<br>Fasting | Focal sharps<br>Generalized spike-wave<br>Normal background | Clobazam                       | <u>Atkins diet</u><br>Carnitine<br>Cornstarch<br>Coenzyme Q10<br>Folic acid<br>P5P<br><u>Triheptanoïn</u> |
|            |                                                              |                          |                                                             | Clonazepam                     |                                                                                                           |
|            |                                                              |                          |                                                             | Ethosuximide                   |                                                                                                           |
|            |                                                              |                          |                                                             | IVIG                           |                                                                                                           |
|            |                                                              |                          |                                                             | Lacosamide                     |                                                                                                           |
|            |                                                              |                          |                                                             | Lamotrigine                    |                                                                                                           |
|            |                                                              |                          |                                                             | Levetiracetam                  |                                                                                                           |
|            |                                                              |                          |                                                             | Levodopa-carbidopa             |                                                                                                           |
|            |                                                              |                          |                                                             | Lorazepam                      |                                                                                                           |
|            |                                                              |                          |                                                             | Oxcarbazepine                  |                                                                                                           |
|            |                                                              |                          |                                                             | Primidone                      |                                                                                                           |
|            |                                                              |                          |                                                             | Steroids                       |                                                                                                           |
|            |                                                              |                          |                                                             | Topiramate                     |                                                                                                           |
|            |                                                              |                          |                                                             | Valproic acid                  |                                                                                                           |
| Zonisamide |                                                              |                          |                                                             |                                |                                                                                                           |
| 2          | Y                                                            | None known               | Focal spikes<br>Excess beta                                 | Levetiracetam                  | Carnitine<br>Folic acid<br>P5P<br>Triheptanoïn                                                            |
|            |                                                              |                          |                                                             | Lorazepam                      |                                                                                                           |

Continued on the next page

Supplementary Table S2. *Continued.*

|   |            |                                                    |                                                                                                          |                                                                                                                                                    |                                                                                                                                      |
|---|------------|----------------------------------------------------|----------------------------------------------------------------------------------------------------------|----------------------------------------------------------------------------------------------------------------------------------------------------|--------------------------------------------------------------------------------------------------------------------------------------|
| 3 | Y (1 wk)   | Fever<br>Fasting<br>Nighttime<br>Sleep transitions | NR                                                                                                       | Clobazam<br>Clonazepam<br>Levetiracetam<br>Valproic acid<br>Vigabatrin                                                                             | P5P<br>Pyridoxine                                                                                                                    |
| 4 | Y (1.5 h)  | Fever<br>Fasting                                   | Right frontal spikes                                                                                     | Carbamazepine<br>Diazepam<br>Lacosamide<br>Lamotrigine<br>Levetiracetam<br>Oxcarbazepine<br>Phenobarbital<br>Phenytoin<br>Vigabatrin<br>Zonisamide | Epilepsy surgery<br>Folic acid<br>Pyridoxine                                                                                         |
| 5 | Y (40 min) | Fever<br>Fear                                      | Focal spikes associated with sleep                                                                       | Carbamazepine<br>Diazepam<br>Levetiracetam<br>Lorazepam<br>Oxcarbazepine<br>Phenobarbital<br>Phenytoin<br>Topiramate<br>Valproic acid              | Folic acid<br>P5P<br>Pyridoxine                                                                                                      |
| 6 | Y (40 min) | Excitement<br>Fatigue<br>Nighttime                 | Most recent EEG normal                                                                                   | Diazepam<br>Levetiracetam<br>Levodopa-carbidopa<br>Oxcarbazepine<br>Phenobarbital<br>Topiramate                                                    | Biotin<br>Carnitine<br>Folic acid<br>Pyridoxine                                                                                      |
| 7 | Y          | None known                                         | Interictal epileptiform activity higher in centrotemporal regions, left > right, especially during sleep | Carbamazepine<br>Ethosuximide<br>Gabapentin<br>Levetiracetam<br>Oxcarbazepine<br>Phenobarbital<br>Vigabatrin<br>Zonisamide                         | Carnitine<br>Folic acid<br>Vitamin C                                                                                                 |
| 8 | Y (15 min) | None known                                         | Irritability in right centrotemporal and left temporal areas                                             | Carbamazepine<br>Levetiracetam<br>Oxcarbazepine<br>Vigabatrin<br>Zonisamide                                                                        | Folic acid<br>Pyridoxine<br>Vitamin C<br>Vitamin E                                                                                   |
| 9 | Y (30 min) | Fever<br>Loud noises<br>Agitation                  | Focal seizures                                                                                           | Carbamazepine<br>Diazepam<br>Felbamate<br>Lacosamide<br>Levetiracetam<br>Phenobarbital<br>Valproic acid                                            | Arginine<br>Cannabidiol<br>Carnitine<br>Folic acid<br>Pyridoxine<br>Vitamin B1<br>Vitamin B2<br>Vitamin B5<br>Vitamin C<br>Vitamin D |

Abbreviations are as follows: NR, not reported; Y, yes; P5P, pyridoxal-5-phosphate.

**Supplementary Table S3.** Additional information on developmental history.

| Subject | Age (years) | Motor development                                                                                                     | Language development                                                                                                     | Social development                                        | Developmental regression                                                               |
|---------|-------------|-----------------------------------------------------------------------------------------------------------------------|--------------------------------------------------------------------------------------------------------------------------|-----------------------------------------------------------|----------------------------------------------------------------------------------------|
| 1       | 11.8        | Sat at 8 months<br>Walked at 4 years<br>Uses adaptive bicycle                                                         | First words at 10 months<br>Follows complex commands                                                                     | Happy disposition<br>Good social skills                   | Language loss between 2-4 years, regained some language after improved seizure control |
| 2       | 2           | Sat at 10 months<br>Able to crawl and cruise<br>Uses a walker                                                         | First words at 20 months<br>Good receptive language<br>Uses sign language, gestures and communication device             | Happy disposition<br>Good social skills                   | None                                                                                   |
| 3       | 2.9         | Unable to sit independently<br>Non-ambulatory                                                                         | Does not speak<br>Good receptive language<br>Uses eyes to communicate<br>Arms/Hands too weak to use communication device | Good sense of humor<br>Good social skills                 | Lost ability to coo and roll at 2 years 10 months                                      |
| 4       | 5.7         | Unable to sit independently<br>Non-ambulatory<br>Uses wheelchair                                                      | Does not speak<br>Understands some words and commands<br>Does not use communication device                               | Good social skills                                        | None                                                                                   |
| 5       | 8.7         | Sat at 1 year<br>Able to stand independently<br>Uses wheelchair, walker and stander                                   | Does not speak<br>Understands some words<br>Uses eyes to communicate                                                     | Throws tantrums when upset                                | None                                                                                   |
| 6       | 9.6         | NR                                                                                                                    | NR                                                                                                                       | NR                                                        | NR                                                                                     |
| 7       | 18.7        | Sat at 2 years<br>Takes steps in therapy with orthotics and assistance, can not walk independently<br>Uses wheelchair | First words at 4 years<br>Good receptive language<br>Uses communication device                                           | Good social skills<br>Good listening and emotional skills | None                                                                                   |
| 8       | 15.5        | Sat at 1 year<br>Walked at 7 years<br>Does not require assistive devices                                              | Does not speak<br>Good receptive language<br>Uses gestures and communication device                                      | NR                                                        | None                                                                                   |
| 9       | 4           | Unable to sit independently<br>Non-ambulatory                                                                         | Does not speak<br>Good receptive language<br>Does not use communication device                                           | Happy disposition                                         | Previously able to sit independently                                                   |

Abbreviation: NR, not reported.

**Supplementary Table S4.** Effect of culture treatments or additives on citrate transport activity in wild type and mutant NaCT.

| Treatment                   | Concentration (mM) or time | Effect on WT | Effect on Mutants | Reference for dosage or approach |
|-----------------------------|----------------------------|--------------|-------------------|----------------------------------|
| Culture treatments:         |                            |              |                   |                                  |
| Cold (28°C)                 | 42 h                       | Decrease 23% | No G219R activity | (1)                              |
| Acetazolamide (AZ)          | 0.50                       | None         | None              | (2)                              |
| 4-Aminopyridine (4AP)       | 0.25                       | Decrease     | None              | (3)                              |
| Glycerol                    | 0.50                       | Decrease     | None              | (4)                              |
| Heptanoic Acid (HA)         | 5.0                        | None         | Not tested        | (5)                              |
| 4-Phenylbutyric acid (4PBA) | 1.0                        | None         | None              | (6)                              |
| Sebacic acid (C10)          | 0.5                        | Decrease 50% | None              | (7)                              |
| Assay treatments:           |                            |              |                   |                                  |
| Heat shock (45°C)           | 15 min                     | Decrease     | None              | (8)                              |
| Methotrexate                | 5 mM                       | Increase 28% | None              | (9)                              |

COS-7 cells cultured in 24 well plates were transfected as described in Materials and Methods. The medium additives or change in culture temperature to 28°C were started 6 h after transfection. Transport of 100  $\mu$ M  $^{14}$ C-citrate was measured 42 h later, as described for Figure 1. Heat shock 45°C was applied for 15 min followed by a 1 h rest at 37°C. Methotrexate was added to the transport medium.

## REFERENCES

- Denning GM, *et al.* (1992) Processing of mutant cystic fibrosis transmembrane conductance regulator is temperature-sensitive. *Nature* 358: 761–4.
- Sterling D, Reithmeier RA, Casey JR. (2001) A transport metabolon. Functional interaction of carbonic anhydrase II and chloride/bicarbonate exchangers. *J. Biol. Chem.* 276:47886–94.
- Schrodl-Haussel M, Theparambil SM, Deitmer JW, Roussa E. (2015) Regulation of functional expression of the electrogenic sodium bicarbonate cotransporter 1, NBCe1 (SLC4A4), in mouse astrocytes. *Glia* 63:1226–39.
- Joshi, A.D. and Pajor, A.M. (2006) Role of conserved prolines in the structure and function of the Na<sup>+</sup>/dicarboxylate cotransporter 1, NaDC1. *Biochemistry* 45:4231–9.
- Heerdt BG, Augenlicht LH. (1991) Effects of fatty acids on expression of genes encoding subunits of cytochrome c oxidase and cytochrome c oxidase activity in HT29 human colonic adenocarcinoma cells. *J. Biol. Chem.* 266:19120–126.
- Suaud L, *et al.* (2011) 4-Phenylbutyrate stimulates Hsp70 expression through the Elp2 component of elongator and STAT-3 in cystic fibrosis epithelial cells. *J. Biol. Chem.* 286:45083–92.
- Membrez M, *et al.* (2010) Six weeks' sebacic acid supplementation improves fasting plasma glucose, HbA1c and glucose tolerance in db/db mice. *Diabetes Obes. Metab.* 12:1120–126.
- Ikari A, Nakano M, Kawano K, Suketa Y. (2002) Up-regulation of sodium-dependent glucose transporter by interaction with heat shock protein 70. *J. Biol. Chem.* 277:33338–43.
- Silva NL, *et al.* (1997) Characterization of the Na<sup>+</sup>/H<sup>+</sup> exchanger in human choriocarcinoma (BeWo) cells. *Pflugers Arch.* 433:792–802.
